# Supplementary material
Source: Springer Nature journal article supplement (https://www.springermedizin.de/resource/supplementary/12913_2013_2829_MOESM5_ESM.pdf/9531634)

System level factor

Adjusted HR (95% CI)

- Emergency Room Visits -

0 visits Reference  
 Per visit 1.04 (95% CI: 1.03-1.05)

- Primary Care Physician Visits -

0 visits 1.11 (95% CI: 0.99-1.25)  
 1-4 visits Reference  
 5-9 visits 1.06 (95% CI: 1.00-1.12)  
 10+ visits 1.23 (95% CI: 1.16-1.29)

- Discharge Disposition -

Discharged Home Reference  
 Transfer to Palliative Care 0.86 (95% CI: 0.62-1.21)  
 Transfer to Long-term Care 0.75 (95% CI: 0.68-0.84)  
 Discharged Home with Support Services 1.13 (95% CI: 1.08-1.20)  
 Discharged Against Medical Advice 1.74 (95% CI: 1.50-2.02)

Hazard Ratio (95% CI)

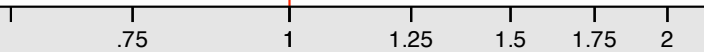

Supplement: MOESM5 [file 9531634]
